# Supplementary material for: Divergent Influenza-Like Viruses of Amphibians and Fish Support an Ancient Evolutionary Association
Source: MDPI journal article supplement (doi:10.3390/v12091042), 2020-09-18
Supplement: s1 [file s1]

Supplementary

# Divergent Influenza-Like Viruses of Amphibians and Fish Support an Ancient Evolutionary Association

Rhys Parry <sup>1,\*†</sup>, Michelle Wille <sup>2,\*†</sup>, Olivia M. H. Turnbull <sup>3</sup>, Jemma L. Geoghegan <sup>4,5</sup> and Edward C. Holmes <sup>2,\*</sup>

<sup>1</sup> Australian Infectious Diseases Research Centre, School of Chemistry and Molecular Biosciences, The University of Queensland, Brisbane, QLD 4067, Australia

<sup>2</sup> Marie Bashir Institute for Infectious Diseases and Biosecurity, School of Life & Environmental Sciences and School of Medical Sciences, The University of Sydney, Sydney, NSW 2006, Australia

<sup>3</sup> Department of Biological Sciences, Macquarie University, Sydney, NSW 2109, Australia; olivia.turnbull@hdr.mq.edu.au

<sup>4</sup> Department of Microbiology and Immunology, University of Otago, Dunedin 9016, New Zealand; jemma.geoghegan@otago.ac.nz

<sup>5</sup> Institute of Environmental Science and Research, Wellington 5018, New Zealand

\* Correspondence: r.parry@uq.edu.au (R.P.); michelle.wille@sydney.edu.au (M.W.); edward.holmes@sydney.edu.au (E.C.H.); Tel.: +617-3365-3302 (R.P.); +61-2-9114-2199 (M.W.); +61-2-9351-5591 (E.C.H.)

† These authors contributed equally to this work.

**Abstract:** Influenza viruses (family *Orthomyxoviridae*) infect a variety of vertebrates, including birds, humans, and other mammals. Recent metatranscriptomic studies have uncovered divergent influenza viruses in amphibians, fish and jawless vertebrates, suggesting that these viruses may be widely distributed. We sought to identify additional vertebrate influenza-like viruses through the analysis of publicly available RNA sequencing data. Accordingly, by data mining, we identified the complete coding segments of five divergent vertebrate influenza-like viruses. Three fell as sister lineages to influenza B virus: salamander influenza-like virus in Mexican walking fish (*Ambystoma mexicanum*) and plateau tiger salamander (*Ambystoma velasci*), Siamese algae-eater influenza-like virus in Siamese algae-eater fish (*Gyrinocheilus aymonieri*) and chum salmon influenza-like virus in chum salmon (*Oncorhynchus keta*). Similarly, we identified two influenza-like viruses of amphibians that fell as sister lineages to influenza D virus: cane toad influenza-like virus and the ornate chorus frog influenza-like virus, in the cane toad (*Rhinella marina*) and ornate chorus frog (*Microhyla fissipes*), respectively. Despite their divergent phylogenetic positions, these viruses retained segment conservation and splicing consistent with transcriptional regulation in influenza B and influenza D viruses, and were detected in respiratory tissues. These data suggest that influenza viruses have been associated with vertebrates for their entire evolutionary history.

**Keywords:** *Orthomyxoviridae*; influenza; metatranscriptomics; fish; amphibians; evolution; phylogeny

**Table S1.** Protein domain families found in influenza viruses.

| Protein domain families    | Accession | Description                                                                                                                                                                                                                                                                                                                                                                                                                                                                                                                                           |
|----------------------------|-----------|-------------------------------------------------------------------------------------------------------------------------------------------------------------------------------------------------------------------------------------------------------------------------------------------------------------------------------------------------------------------------------------------------------------------------------------------------------------------------------------------------------------------------------------------------------|
| Flu_PB1                    | pfam00602 | Influenza RNA-dependent RNA polymerase subunit PB1; Two GTP binding sites exist in this protein.                                                                                                                                                                                                                                                                                                                                                                                                                                                      |
| Flu_PB2 super family       | cl20020   | Influenza RNA-dependent RNA polymerase subunit PB2; PB2 can bind 5' end cap structure of RNA.                                                                                                                                                                                                                                                                                                                                                                                                                                                         |
| Flu_PA super family        | cl02905   | Influenza RNA-dependent RNA polymerase subunit PA.                                                                                                                                                                                                                                                                                                                                                                                                                                                                                                    |
| Hemagglutinin super family | cl10565   | Haemagglutinin; Haemagglutinin from influenza virus causes membrane fusion of the viral membrane with the host membrane. Fusion occurs after the host cell internalizes the virus by endocytosis. The drop of pH causes release of a hydrophobic fusion peptide and a large conformational change leading to membrane fusion.                                                                                                                                                                                                                         |
| Sialidase super family     | cl21531   | Sialidases /neuraminidases function to bind and hydrolyze terminal sialic acid residues from various glycoconjugates as well as playing roles in pathogenesis, bacterial nutrition and cellular interactions. They have a six-bladed beta-propeller fold. This hierarchy includes eubacterial, eukaryotic, and viral sialidases.                                                                                                                                                                                                                      |
| Hema_esterase super family | cl28016   | Hemagglutinin esterase;                                                                                                                                                                                                                                                                                                                                                                                                                                                                                                                               |
| Hema_stalk super family    | cl07368   | Influenza C hemagglutinin stalk; This domain corresponds to the stalk segment of hemagglutinin in influenza C virus. It forms a coiled coil structure.                                                                                                                                                                                                                                                                                                                                                                                                |
| Neur super family          | cl19749   | Neuraminidase; Neuraminidases cleave sialic acid residues from glycoproteins. Belong to the sialidase family - but this alignment does not generalize to the other sialidases. Structure is a 6-sheet beta propeller.                                                                                                                                                                                                                                                                                                                                 |
| NB super family            | cl04425   | NB glycoprotein; The NB glycoprotein is found in Influenza type B virus. Its function is unknown.                                                                                                                                                                                                                                                                                                                                                                                                                                                     |
| Flu_M1                     | pfam00598 | Influenza Matrix protein (M1); This protein forms a continuous shell on the inner side of the lipid bilayer.                                                                                                                                                                                                                                                                                                                                                                                                                                          |
| Flu_M1_C super family      | cl27878   | Influenza Matrix protein (M1) C-terminal domain; This region is thought to be a second domain of the M1 matrix protein.                                                                                                                                                                                                                                                                                                                                                                                                                               |
| Flu_B_M2 super family      | cl04739   | Influenza B matrix protein 2 (BM2); M2 is synthesized in the late phase of infection and incorporated into the virion. It may be phosphorylated in vivo. The function of BM2 is unknown.                                                                                                                                                                                                                                                                                                                                                              |
| CM1 super family           | cl03846   | Influenza C virus M1 protein; This family represents the matrix 1 protein of influenza C virus. The protein is the product of a spliced mRNA. Small quantities of the unspliced mRNA are found in the cell additionally encoding the M2 protein (see pfam03021).                                                                                                                                                                                                                                                                                      |
| CM2 super family           | cl03843   | Influenza C virus M2 protein; Influenza C virus M1 protein is encoded by a spliced mRNA. The unspliced mRNA is also found in small quantities and can encode the protein represented by this family.                                                                                                                                                                                                                                                                                                                                                  |
| Flu_B_NS1 super family     | cl03792   | Influenza B non-structural protein (NS1); A specific region of the influenza B virus NS1 protein, which includes part of its effector domain, blocks the covalent linkage of ISG15 to its target proteins both in vitro and in infected cells. Of the several hundred proteins induced by interferon (IFN) alpha/beta, the ubiquitin-like ISG15 protein is one of the most predominant. Influenza A virus employs a different strategy: its NS1 protein does not bind the ISG15 protein, but little or no ISG15 protein is produced during infection. |
| Flu_C_NS1 super family     | cl04118   | Influenza C non-structural protein (NS1); The influenza C virus genome consists of seven single-stranded RNA segments. The shortest RNA segment encodes a 286 amino acid non-structural protein NS1. This protein contains 6 conserved cysteines that may be functionally important, perhaps binding to a metal ion.                                                                                                                                                                                                                                  |
| Flu_C_NS2 super family     | cl04153   | Influenza C non-structural protein (NS2); The influenza C virus genome consists of seven single-stranded RNA segments. The shortest RNA segment encodes a 286 amino acid non-structural protein NS1 pfam03506 as well as the NS2 protein. The NS2 protein is only about 60 amino acids in length and of unknown function.                                                                                                                                                                                                                             |

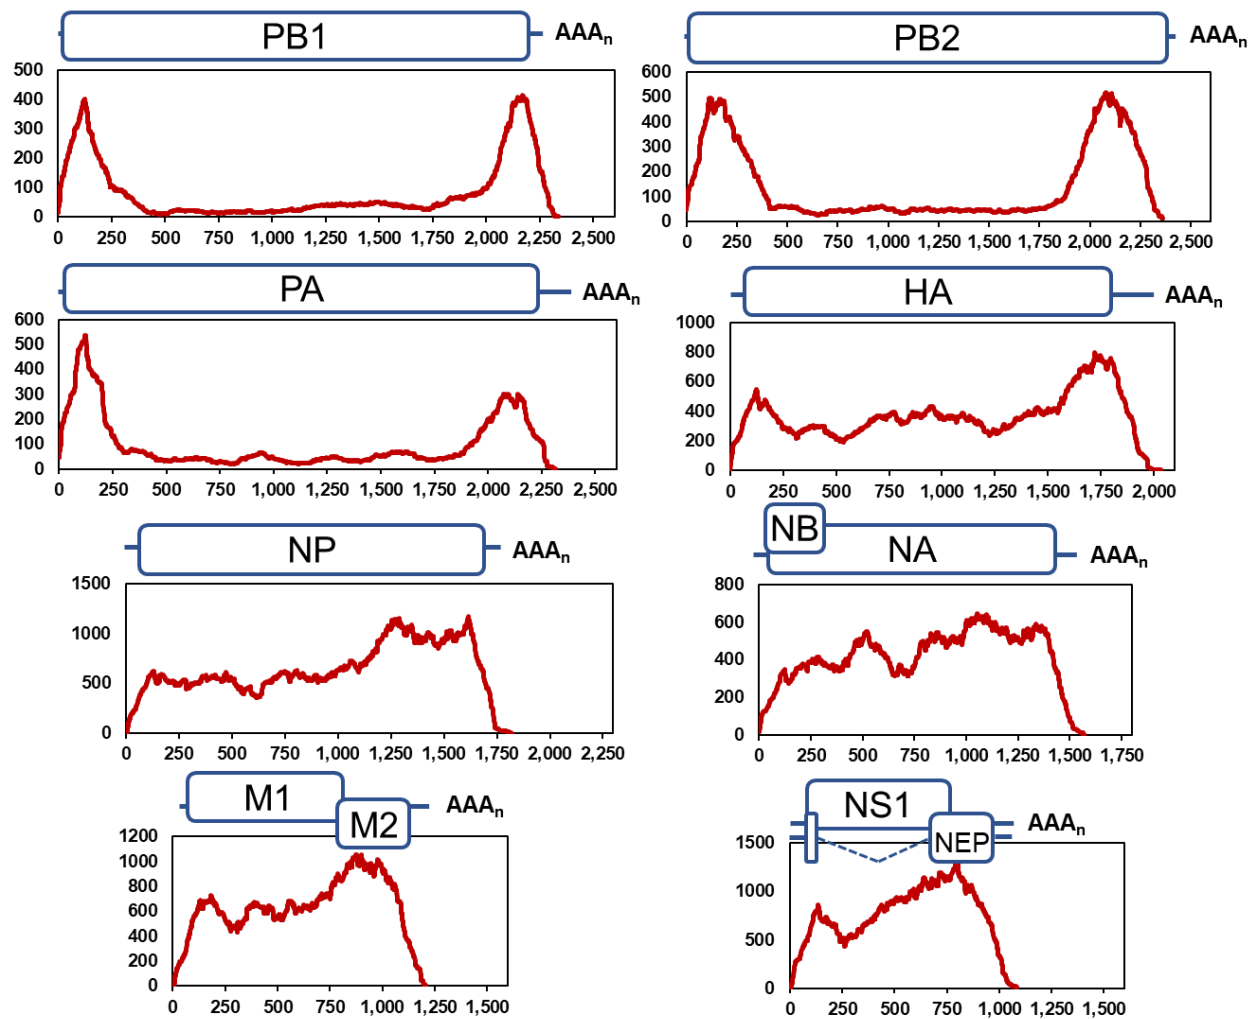

**Figure S1.** Genome organization and mapping coverage of Salamander influenza-like virus. Coloured boxes correspond to predicted protein domains. PB1, RNA-dependent RNA polymerase basic subunit 1; PB2, RNA-dependent RNA polymerase basic subunit 2; PA, RNA-dependent RNA polymerase acidic subunit; NP, nucleoprotein; HA, hemagglutinin; NA, neuraminidase; M1/M2, matrix proteins 1 & 2; NS1, non-structural protein; NEP, nuclear export protein. Isoform variants of genes indicated by dotted lines. Sequencing data taken from spinal cord samples of *Ambystoma mexicanum* (BioProject Accession: PRJNA506973, Pooled samples: SRR8244387, SRR8244388, SRR8244389) [1].

**Table S2.** Annotation of Salamander influenza-like virus.

|                                                                                               | Location;<br>Amino<br>acid size | Closest BLASTp hit; Query cover<br>(%); Identity (%)                                           | E-value              | Protein<br>domain<br>families | Accession | Interval | E-value                 |
|-----------------------------------------------------------------------------------------------|---------------------------------|------------------------------------------------------------------------------------------------|----------------------|-------------------------------|-----------|----------|-------------------------|
| PB1 Segment 2331nt                                                                            |                                 |                                                                                                |                      |                               |           |          |                         |
| ORF1<br>PB1                                                                                   | 23-2272;<br>749aa               | polymerase PB1 [Influenza B virus<br>(B/Victoria/593/2011)] AGX21686.1;<br>100%; 75.57%        | 0                    | Flu_PB1                       | pfam0060  | 21–740   | 0                       |
| PB2 Segment 2362nt                                                                            |                                 |                                                                                                |                      |                               |           |          |                         |
| ORF1<br>PB2                                                                                   | 23-2329;<br>769aa               | polymerase PB2 [Influenza B virus]<br>AZY32600.1; 99%; 61.83%                                  | 0                    | Flu_PB2 super<br>family       | cl20020   | 13–761   | 0                       |
| PA Segment 1570nt                                                                             |                                 |                                                                                                |                      |                               |           |          |                         |
| ORF1<br>PA                                                                                    | 33-2231;<br>732aa               | polymerase PA [Influenza B virus<br>(B/Indiana/07/2016)] ANW74127.1;<br>97%; 59.64%            | 0                    | Flu_PA super<br>family        | cl02905   | 21–715   | 0                       |
| HA Segment 1981nt                                                                             |                                 |                                                                                                |                      |                               |           |          |                         |
| ORF1<br>HA                                                                                    | 67-1830;<br>587aa               | hemagglutinin [Wuhan spiny eel<br>influenza virus] AVM87624.1; 95%;<br>43.34%                  | $8 \times 10^{-161}$ | Hemagglutinin<br>super family | cl10565   | 26–587   | $8.38 \times 10^{-113}$ |
| NP Segment 1809nt                                                                             |                                 |                                                                                                |                      |                               |           |          |                         |
| ORF1<br>NP                                                                                    | 78-1718;<br>546aa               | nucleoprotein [Influenza B virus<br>(B/Malaysia/10928/1996)] AFJ80155.1; 89%; 50.60%           | $1 \times 10^{-171}$ | Flu_NP super<br>family        | cl27387   | 48–541   | 0                       |
| NA Segment 1555nt                                                                             |                                 |                                                                                                |                      |                               |           |          |                         |
| ORF1<br>NA                                                                                    | 68-1471;<br>467aa               | neuraminidase [Influenza B virus]<br>AVP05457.1; 94%; 46.29%                                   | $5 \times 10^{-146}$ | Neur super<br>family          | cl19749   | 118–448  | $3.14 \times 10^{-111}$ |
| ORF2<br>NB                                                                                    | 61-330;<br>89aa                 | NB protein [Influenza B virus<br>(B/California/02/2017)] AQS20108.1;<br>65%; 35.00%            | 0.023                | NB super<br>family            | cl04425   | 19–59    | 0.17                    |
| M Segment 1201nt                                                                              |                                 |                                                                                                |                      |                               |           |          |                         |
| ORF1                                                                                          | 45-791;<br>248aa                | matrix protein 1 [Influenza B virus<br>(B/California/07/2015)] ANE25075.1;<br>99%; 48.79%      | $2 \times 10^{-82}$  | Flu_M1                        | pfam00598 | 2–155    | $2.71 \times 10^{-44}$  |
|                                                                                               |                                 |                                                                                                |                      | Flu_M1_C<br>super family      | cl27878   | 158–247  | $9.22 \times 10^{-13}$  |
| ORF2                                                                                          | 788-1138;<br>116aa              | BM2 protein [Influenza B virus<br>(B/Florida/52/2016)] ANW76071.1;<br>93%; 25.69%              | 0.33                 | Flu_B_M2<br>super family      | cl04739   | 6–114    | $1.04 \times 10^{-3}$   |
| NS Segment Isoform 1: 1083nt                                                                  |                                 |                                                                                                |                      |                               |           |          |                         |
| ORF1                                                                                          | 70-795;<br>242aa                | nonstructural protein 1 [Influenza B<br>virus] QCG85998.1; 94%; 29.01%                         | $1 \times 10^{-25}$  | Flu_B_NS1<br>super family     | cl03792   | 5-216    | $2.78 \times 10^{-26}$  |
| ORF2                                                                                          | 683-1003;<br>107aa              | nuclear export protein [Influenza B<br>virus] AXA17238.1; 95%; 25.71%                          | 0.012                |                               |           |          |                         |
| NS Segment Isoform 2: 512nt Splice junction 70–96; 668–1003 of NS Segment Isoform 1 reference |                                 |                                                                                                |                      |                               |           |          |                         |
| NEP                                                                                           | 120aa                           | nuclear export protein [Influenza B<br>virus (B/Wisconsin/46/2017)]<br>ATP82168.1; 91%; 26.55% | $1 \times 10^{-4}$   |                               |           |          |                         |

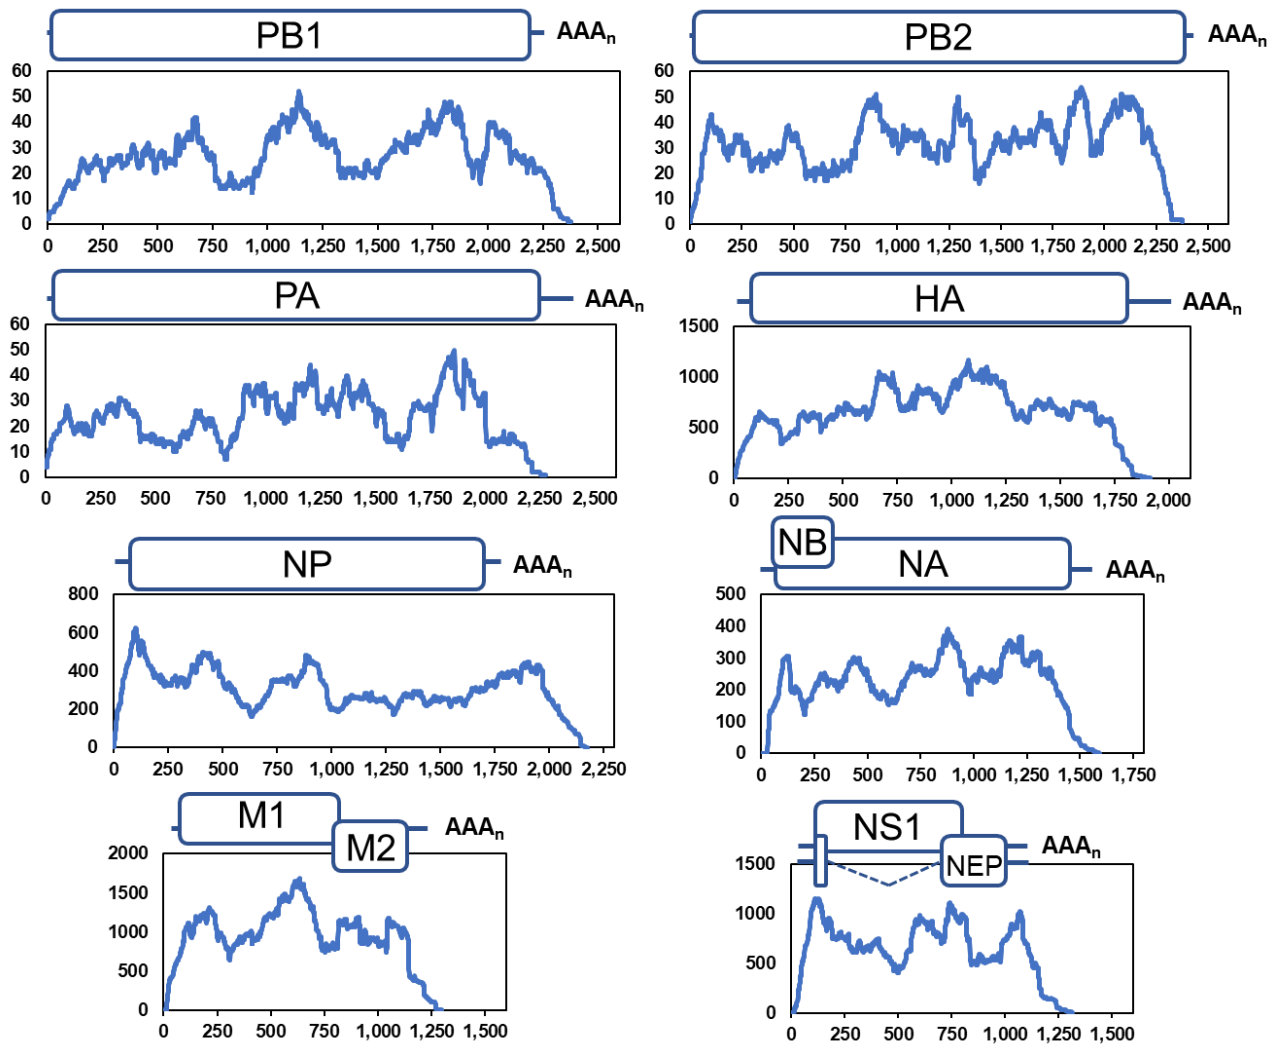

**Figure S2.** Genome organization and mapping coverage of Chum salmon influenza-like virus. Coloured boxes correspond to predicted protein domains. PB1, RNA-dependent RNA polymerase basic subunit 1; PB2, RNA-dependent RNA polymerase basic subunit 2; PA, RNA-dependent RNA polymerase acidic subunit; NP, nucleoprotein; HA, hemagglutinin; NA, neuraminidase; M1/M2, matrix proteins 1 & 2 ; NS1, non-structural protein; NEP, nuclear export protein. Isoform variants of genes indicated by dotted lines. Sequencing data taken from gill samples of *Oncorhynchus keta* (SRA Accession: SRR6998471) [2].

**Table S3.** Annotation of Chum salmon influenza-like virus.

|                                                                                                  | Location;<br>Amino<br>acid size | Closest BLASTp hit; Query cover<br>(%); Identity (%)                                                         | E-value              | Protein<br>domain<br>families      | Accession            | Interval         | E-value                                         |
|--------------------------------------------------------------------------------------------------|---------------------------------|--------------------------------------------------------------------------------------------------------------|----------------------|------------------------------------|----------------------|------------------|-------------------------------------------------|
| PB1 Segment 2378nt                                                                               |                                 |                                                                                                              |                      |                                    |                      |                  |                                                 |
| ORF1<br>PB1                                                                                      | 50-2302;<br>749aa               | polymerase PB1 [Influenza B virus]<br>QHI05420.1 100%; 69.50%                                                | 0.0                  | Flu_PB1                            | pfam0060             | 1–739            | 0                                               |
| PB2 Segment 2378nt                                                                               |                                 |                                                                                                              |                      |                                    |                      |                  |                                                 |
| ORF1<br>PB2                                                                                      | 23-2317;<br>765aa               | PB2 [Influenza B virus<br>(B/Memphis/5/93)] AAU94860.1;<br>99%; 57.05%                                       | 0                    | Flu_PB2 super<br>family            | cl20020              | 3–758            | 0                                               |
| PA Segment 2276nt                                                                                |                                 |                                                                                                              |                      |                                    |                      |                  |                                                 |
| ORF1<br>PA                                                                                       | 43-2208;<br>720aa               | polymerase PA [Influenza B virus<br>(B/Taiwan/45/2007)] ACO06009.1;<br>99%; 51.88%                           | 0.0                  | Flu_PA super<br>family             | cl02905              | 21–713           | 0                                               |
| HA Segment 1914nt                                                                                |                                 |                                                                                                              |                      |                                    |                      |                  |                                                 |
| ORF1<br>HA                                                                                       | 31-1767;<br>578aa               | hemagglutinin [Influenza B virus<br>(B/Palermo/109/2013)]<br>AMB72263.1; 90%; 32.90%                         | $2 \times 10^{-75}$  | Hemagglutinin<br>super family      | cl10565              | 26–520           | $4.48 \times 10^{-82}$                          |
| NP Segment 2174nt                                                                                |                                 |                                                                                                              |                      |                                    |                      |                  |                                                 |
| ORF1<br>NP                                                                                       | 82-2052;<br>656aa               | nucleoprotein [Influenza B virus<br>(B/NYMC BX-15(Lee/1940-<br>Hawaii/33/2004))]; ACO05951.1;<br>82%; 44.50% | $5 \times 10^{-152}$ | Flu_NP super<br>family             | cl27387              | 129–652          | $3.16 \times 10^{-156}$                         |
| NA Segment 1580nt                                                                                |                                 |                                                                                                              |                      |                                    |                      |                  |                                                 |
| ORF1<br>NA                                                                                       | 64-1458;<br>463aa               | neuraminidase [Influenza B virus<br>(B/Waikato/70/2005)] AGX22801.1;<br>97%; 38.76%                          | $3 \times 10^{-97}$  | Sialidase super<br>family          | cl21531              | 88–58            | $7.18 \times 10^{-88}$                          |
| ORF2<br>NB                                                                                       | 84-512;<br>141aa                |                                                                                                              |                      |                                    |                      |                  |                                                 |
| M Segment 1313nt                                                                                 |                                 |                                                                                                              |                      |                                    |                      |                  |                                                 |
| ORF1                                                                                             | 30-770;<br>246aa                | matrix protein 1 [Influenza B virus]<br>AVR49412.1; 89%; 34.53%                                              | $1 \times 10^{-45}$  | Flu_M1<br>Flu_M1_C<br>super family | pfam00598<br>cl27878 | 9–153<br>158–242 | $9.51 \times 10^{-32}$<br>$1.87 \times 10^{-6}$ |
| ORF2                                                                                             | 733-1116;<br>126aa              | No BLASTp hit. Transmembrane<br>domain predicted at N terminus.                                              |                      | uvrC super<br>family               | cl35109              | 49–110           | $7.14 \times 10^{-4}$                           |
| NS Segment Isoform 1: 1360nt                                                                     |                                 |                                                                                                              |                      |                                    |                      |                  |                                                 |
| ORF1                                                                                             | 54-1055;<br>333aa               | NS [Wuhan spiny eel influenza<br>virus] AVM87628.1; 20%; 38.36%                                              | 1.8                  | Flu_B_NS1<br>super family          | cl03792              | 4–51             | 0.05                                            |
| ORF2                                                                                             | 879-1214;<br>111aa              |                                                                                                              |                      |                                    |                      |                  |                                                 |
| NS Segment Isoform 2: 645nt, Splice junction 1–196:922–1360 of NS segment isoform 1 as reference |                                 |                                                                                                              |                      |                                    |                      |                  |                                                 |
| ORF1                                                                                             | 54-545;<br>163aa                |                                                                                                              |                      |                                    |                      |                  |                                                 |

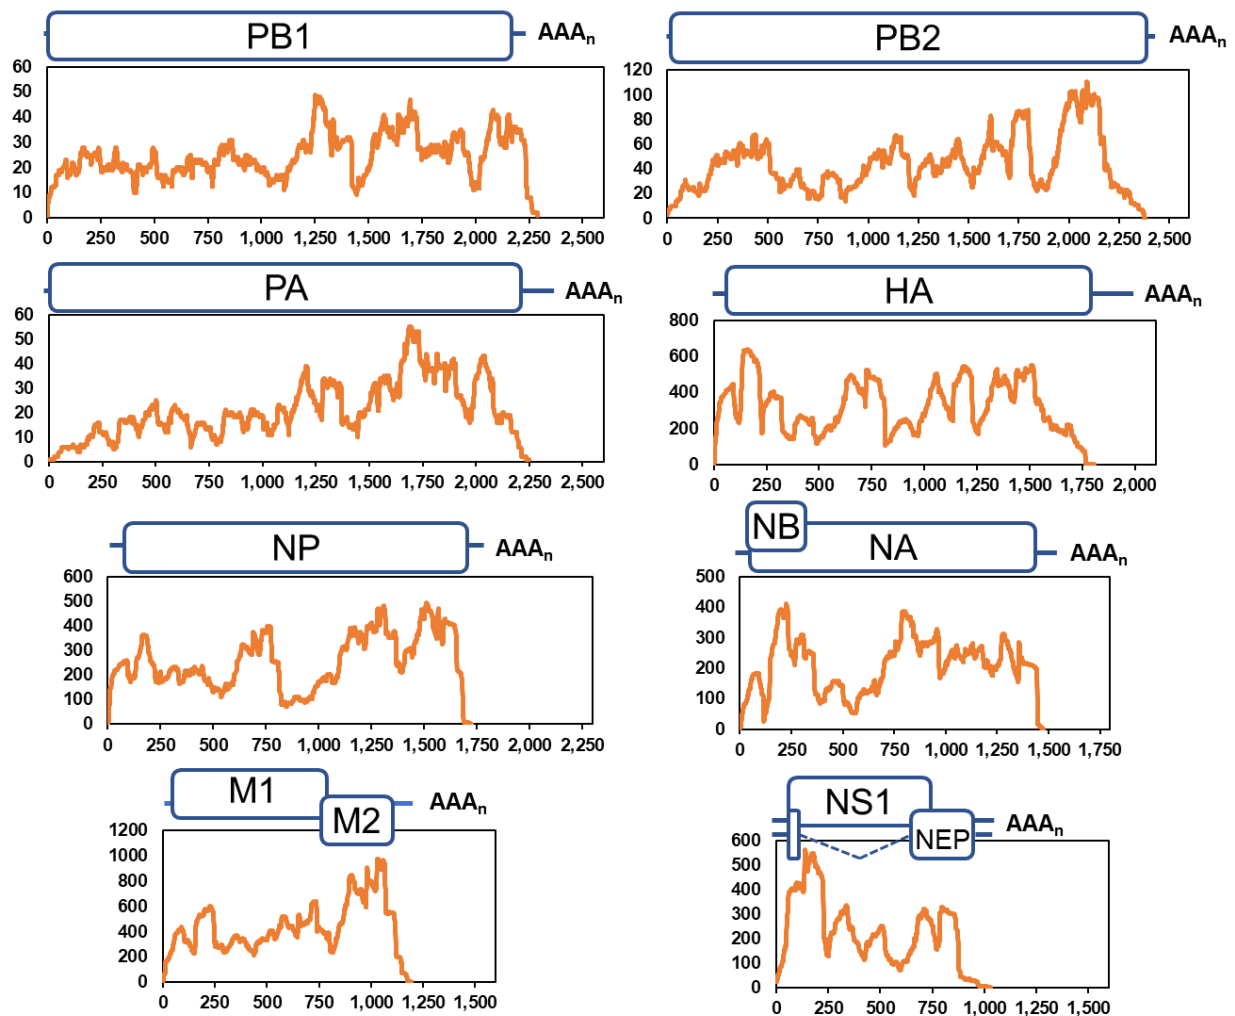

**Figure S3.** Genome organization and mapping coverage of Siamese algae-eater influenza-like virus. Coloured boxes correspond to predicted protein domains. PB1, RNA-dependent RNA polymerase basic subunit 1; PB2, RNA-dependent RNA polymerase basic subunit 2; PA, RNA-dependent RNA polymerase acidic subunit; NP, nucleoprotein; HA, hemagglutinin; NA, neuraminidase; M1/M2, matrix proteins 1 & 2; NS1, non-structural protein; NEP, nuclear export protein. Isoform variants of genes indicated by dotted lines. Sequencing data are taken from an individual library of gill samples sampled as part of the Fish-T1K Project (SRA Accession: SRR5997773) [3].

**Table S4.** Annotation of Siamese algae-eater influenza-like virus.

|                                                                                                  | Location;<br>Amino<br>acid size | Closest BLASTp hit; Query cover (%); Identity (%)                                                 | E-value              | Protein<br>domain<br>families                 | Accession            | Interval         | E-value                                          |
|--------------------------------------------------------------------------------------------------|---------------------------------|---------------------------------------------------------------------------------------------------|----------------------|-----------------------------------------------|----------------------|------------------|--------------------------------------------------|
| PB1 Segment 2291nt                                                                               |                                 |                                                                                                   |                      |                                               |                      |                  |                                                  |
| ORF1<br>PB1                                                                                      | 17-2290;<br>756aa               | polymerase PB1 [Influenza B virus] QHI05420.1;<br>99%; 69.46%                                     | 0.0                  | Flu_PB1                                       | pfam0060             | 6–747            | 0                                                |
| PB2 Segment 2380nt                                                                               |                                 |                                                                                                   |                      |                                               |                      |                  |                                                  |
| ORF1<br>PB2                                                                                      | 24-2360;<br>777aa               | polymerase PB2 [Influenza B virus (B/New<br>York/1121/2007)] AHL92298.1; 99%; 48.52%              | 0                    | Flu_PB2 super<br>family                       | cl20020              | 3–769            | 0                                                |
| PA Segment 2251nt                                                                                |                                 |                                                                                                   |                      |                                               |                      |                  |                                                  |
| ORF1<br>PA                                                                                       | 20-2245;<br>740aa               | PA [Wuhan spiny eel influenza virus]<br>AVM87622.1; 96%; 53.89%                                   | 0.0                  | Flu_PA super<br>family                        | cl02905              | 21–714           | 0                                                |
| HA Segment 1807nt                                                                                |                                 |                                                                                                   |                      |                                               |                      |                  |                                                  |
| ORF1<br>HA                                                                                       | 24-1754;<br>575aa               | hemagglutinin [Wuhan spiny eel influenza<br>virus] AVM87624.1; 97%; 33.84%                        | $6 \times 10^{-91}$  | Hemagglutinin<br>super family                 | cl10565              | 20–576           | $5.21 \times 10^{-103}$                          |
| NP Segment 1725nt                                                                                |                                 |                                                                                                   |                      |                                               |                      |                  |                                                  |
| ORF1<br>NP                                                                                       | 43-1671;<br>541aa               | nucleocapsid protein [Influenza A virus]<br>QDA17788.1; 88%; 44.12%                               | $2 \times 10^{-135}$ | Flu_NP super<br>family                        | cl27387              | 36–542           | $1.68 \times 10^{-158}$                          |
| NA Segment 1474nt                                                                                |                                 |                                                                                                   |                      |                                               |                      |                  |                                                  |
| ORF1<br>NA                                                                                       | 47-1453;<br>467aa               | neuraminidase [Influenza B virus (B/North<br>Carolina/11/2017)] ARO42774.1; 91%; 43.09%           | $2 \times 10^{-125}$ | Sialidase super<br>family                     | cl21531              | 88–465           | $2.99 \times 10^{-108}$                          |
| ORF2<br>NB                                                                                       | 52-366;<br>103aa                |                                                                                                   |                      |                                               |                      |                  |                                                  |
| M Segment 1194nt                                                                                 |                                 |                                                                                                   |                      |                                               |                      |                  |                                                  |
| ORF1                                                                                             | 29-793;<br>253aa                | matrix protein 1 [Influenza A virus]<br>QFX66948.1; 99% 41.50%                                    | $4 \times 10^{-77}$  | Flu_M1<br>Flu_M1_C<br>super family            | pfam00598<br>cl27878 | 4–157<br>161–252 | $4.92 \times 10^{-30}$<br>$9.38 \times 10^{-19}$ |
| ORF2                                                                                             | 793-1167;<br>123aa              | BM2 protein [Influenza B virus] AAD29189.1;<br>82%; 30.19%                                        | 1.5                  | Flu_B_M2<br>super family                      | cl04739              | 8–108            | $7.07 \times 10^{-4}$                            |
| NS Segment Isoform 1: 1081nt                                                                     |                                 |                                                                                                   |                      |                                               |                      |                  |                                                  |
| ORF1                                                                                             | 23-880;<br>285aa                | NS [Wuhan spiny eel influenza virus] 13%;<br>51.28%                                               | 0.61                 | Flu_B_NS1<br>super family                     | cl03792              | 7–136            | $2.78 \times 10^{-4}$                            |
| ORF2                                                                                             | 714-1058;<br>114aa              | NEP [Influenza A virus<br>(A/swine/Netherlands/Groenlo-37/2012(H1N1))]<br>100%; 24.56%            | 0.1                  | Influenza non-<br>structural<br>protein (NS2) | pfam00601            | 22–114           | 0.0017                                           |
| NS Segment Isoform 2: 669nt, Splice junction 1–298:711–1081 of NS segment isoform 1 as reference |                                 |                                                                                                   |                      |                                               |                      |                  |                                                  |
| ORF1                                                                                             | 23-646<br>132aa                 | NEP [Influenza A virus<br>(A/swine/Netherlands/Groenlo-37/2012(H1N1))]<br>AKJ80762.1; 88%; 23.93% | 0.089                | Influenza non-<br>structural<br>protein (NS2) | pfam00601            | 40–132           | 0.0028                                           |





**Table S5.** Annotation of Ornate chorus frog influenza-like virus.

|                                                                                                 | Location;<br>Amino<br>acid size | Closest BLASTp hit; Query<br>cover (%); Identity (%)                                             | E-value              | Protein<br>domain<br>families | Accession | Interval | E-value                |
|-------------------------------------------------------------------------------------------------|---------------------------------|--------------------------------------------------------------------------------------------------|----------------------|-------------------------------|-----------|----------|------------------------|
| PB1 Segment 2375nt                                                                              |                                 |                                                                                                  |                      |                               |           |          |                        |
| ORF1<br>PB1                                                                                     | 14-2314;<br>765aa               | polymerase PB1 [Influenza D virus (D/bovine/Mississippi/C00046N/2014)] ALE66333.1; 98%; 81.91%   | 0                    | Flu_PB1                       | pfam0060  | 14-749   | 0                      |
| PB2 Segment 2395nt                                                                              |                                 |                                                                                                  |                      |                               |           |          |                        |
| ORF1<br>PB2                                                                                     | 29-2396;<br>712aa               | polymerase PB2 [Influenza D virus (D/swine/Italy/173287-4/2016)] AON76692.1; 99%; 68.22%         | 0                    | Flu_PB2<br>super family       | cl20020   | 5-771    | 0                      |
| P3 Segment 2196nt                                                                               |                                 |                                                                                                  |                      |                               |           |          |                        |
| ORF1<br>P3                                                                                      | 26-2127;<br>712aa               | polymerase 3 [Influenza D virus (D/bovine/Shandong/Y127/2014)] AIE52107.1; 99%; 63.78%           | 0                    | Flu_PA super<br>family        | cl02905   | 20-705   | 0                      |
| HEF Segment 2263nt                                                                              |                                 |                                                                                                  |                      |                               |           |          |                        |
| ORF1<br>HEF                                                                                     | 124-2205;<br>693aa              | hemagglutinin-esterase [Influenza C virus (C/Minnesota/25/2015)] AST08262.1; 92%; 40.95%         | $2 \times 10^{-163}$ | Hema<br>esterase              | cl28016   | 39-417   | $4.45 \times 10^{-66}$ |
|                                                                                                 |                                 |                                                                                                  |                      | Hema_stalk<br>super family    | cl07368   | 448-619  | $5.29 \times 10^{-58}$ |
| NP Segment 1823nt                                                                               |                                 |                                                                                                  |                      |                               |           |          |                        |
| ORF1<br>NP                                                                                      | 33-1751;<br>571aa               | nucleoprotein [Influenza D virus (D/bovine/Yamagata/10710/2016)] BBC14931.1; 89%; 54.62%         | 0                    | Flu_NP<br>super family        | cl27387   | 3-498    | $9.48 \times 10^{-24}$ |
| M Segment Isoform 1: 1273nt                                                                     |                                 |                                                                                                  |                      |                               |           |          |                        |
| ORF1                                                                                            | 63-1241;<br>392aa               | P42 [Influenza D virus (D/bovine/Texas/3-13/2011)] AIO11642.1; 91%; 51.81%                       | $2 \times 10^{-128}$ | CM1 super<br>family           | cl03846   | 1-233    | $2.69 \times 10^{-70}$ |
|                                                                                                 |                                 |                                                                                                  |                      | CM2 super<br>family           | cl03843   | 241-388  | $4.58 \times 10^{-3}$  |
| M Segment Isoform 2: 980nt, Splice junction 1-791:1081-1273 of M segment isoform 1 as reference |                                 |                                                                                                  |                      |                               |           |          |                        |
| ORF1<br>CM1-<br>CM2                                                                             | 63-803<br>246aa                 | P42 [Influenza D virus (D/bovine/Kansas/11-8/2012)] AIO11618.1; 99%; 59.27%                      | $6 \times 10^{-92}$  | CM1 super<br>family           | cl03846   | 1-233    | $2.69 \times 10^{-70}$ |
| NS Segment Isoform 2: 867nt                                                                     |                                 |                                                                                                  |                      |                               |           |          |                        |
| ORF1<br>CM1                                                                                     | 36-740;<br>234aa                | nonstructural protein 1 [Influenza D virus (D/bovine/Minnesota/729/2013)] AGS48800.1; 99; 48.74% | $5 \times 10^{-75}$  | Flu_C_NS1<br>super family     | cl04118   | 82-205   | $2.50 \times 10^{-9}$  |
|                                                                                                 |                                 |                                                                                                  |                      | Flu_C_NS2<br>super family     | cl04153   | 7-63     | $2.56 \times 10^{-5}$  |
| ORF2                                                                                            | 483-791;<br>102aa               | nonstructural protein 2 [Influenza D virus] BBM60900.1; 98%; 46.53%                              | $4 \times 10^{-23}$  |                               |           |          |                        |
| NS Segment Isoform 2: 518nt, Splice junction 1-126:473-863 of NS segment isoform 1 as reference |                                 |                                                                                                  |                      |                               |           |          |                        |
| ORF1                                                                                            | 36-491:<br>151aa                | NS2 [Influenza D virus (D/bovine/Oklahoma/660/2013)] AGS48808.1; 100%; 39.13%                    | $1 \times 10^{-29}$  |                               |           |          |                        |

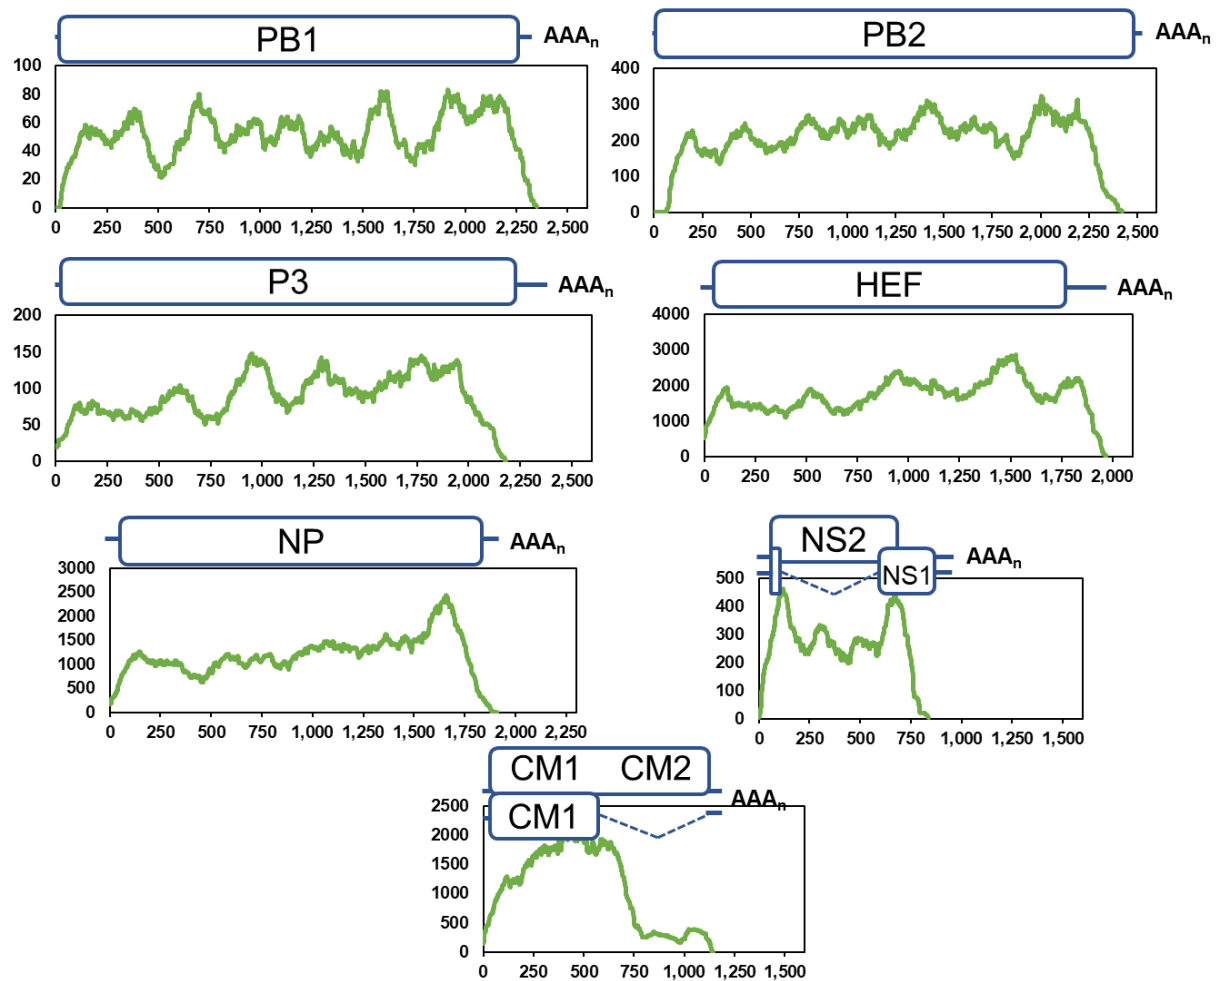

**Figure S5.** Genome organization and mapping coverage of Cane toad influenza-like virus. Coloured boxes correspond to predicted protein domains. PB1, RNA-dependent RNA polymerase basic subunit 1; PB2, RNA-dependent RNA polymerase basic subunit 2; PA, RNA-dependent RNA polymerase acidic subunit; NP, nucleoprotein; HEF, Hemagglutinin esterase; CM1/CM2, Influenza C virus matrix proteins 1 & 2; NS1/NS2, non-structural protein 1 & 2; Isoform variants of genes indicated by dotted lines. Sequencing data taken from whole larval samples from Innisfail, QLD (SRA accessions: SRR5446725, SRR5446726) [5].

**Table S6.** Annotation of Cane toad influenza-like virus.

|                                                                                                 | Location;<br>Amino<br>acid size | Closest BLASTp hit; Query<br>cover (%); Identity (%)                                                      | E-value              | Protein<br>domain<br>families              | Accession | Interval | E-value                |
|-------------------------------------------------------------------------------------------------|---------------------------------|-----------------------------------------------------------------------------------------------------------|----------------------|--------------------------------------------|-----------|----------|------------------------|
| PB1 Segment 2350nt                                                                              |                                 |                                                                                                           |                      |                                            |           |          |                        |
| ORF1<br>PB1                                                                                     | 44-2308;<br>753aa               | polymerase PB1 [Influenza D<br>virus (D/bovine/Mexico/<br>S7/2015)] AMN87903.1; 99%;<br>77.03%            | 0                    | Flu_PB1                                    | pfam0060  | 1–734    | 0                      |
| PB2 Segment 2421nt                                                                              |                                 |                                                                                                           |                      |                                            |           |          |                        |
| ORF1<br>PB2                                                                                     | 86-2419;<br>777aa               | polymerase PB2 [Influenza D<br>virus (D/bovine/Kansas/14-<br>22/2012)] AIO11621.1; 99%;<br>62.87%         | 0                    | Flu_PB2<br>super family                    | cl20020   | 5–774    | 0                      |
| P3 Segment 2180nt                                                                               |                                 |                                                                                                           |                      |                                            |           |          |                        |
| ORF1<br>P3                                                                                      | 4-2151;<br>714aa                | polymerase P3 [Influenza D<br>virus (D/bovine/Yamagata/<br>10710/2016)] BBC14929.1; 100%;<br>62.66%       | 0                    | Flu_PA super<br>family                     | cl02905   | 24–707   | 0                      |
| HEF Segment 1968nt                                                                              |                                 |                                                                                                           |                      |                                            |           |          |                        |
| ORF1<br>HEF                                                                                     | 6-1967;<br>653aa                | hemagglutinin-esterase<br>[Influenza D virus<br>(D/bovine/Ibaraki/7768/2016)]<br>BAV17997.1; 100%; 40.66% | $5 \times 10^{-169}$ | Hema<br>esterase                           | cl28016   | 62–417   | $1.24 \times 10^{-60}$ |
|                                                                                                 |                                 |                                                                                                           |                      | super family<br>Hema_stalk<br>super family | cl07368   | 449–620  | $3.78 \times 10^{-48}$ |
| NP Segment 1911nt                                                                               |                                 |                                                                                                           |                      |                                            |           |          |                        |
| ORF1<br>NP                                                                                      | 15-1817;<br>599aa               | nucleoprotein [Influenza D<br>virus (D/bovine/Yamagata/<br>10710/2016)] BBC14931.1; 87%;<br>49.34%        | 0                    | Flu_NP<br>super family                     | cl27387   | 27–496   | $8.51 \times 10^{-22}$ |
| M Segment Isoform 1: 1181nt                                                                     |                                 |                                                                                                           |                      |                                            |           |          |                        |
| ORF1<br>CM1-<br>CM2                                                                             | 34-1167;<br>377aa               | P42 [Influenza D virus<br>(D/bovine/Texas/3-13/2011)]<br>AIO11642.1; 99%; 46.15%                          | $3 \times 10^{-95}$  | CM1 super<br>family                        | cl03846   | 1–233    | $1.17 \times 10^{-67}$ |
|                                                                                                 |                                 |                                                                                                           |                      | CM2 super<br>family                        | cl03843   | 236–370  | $1.89 \times 10^{-03}$ |
| M Segment Isoform 2: 967nt, Splice junction 1–761:1028–1233 of M segment isoform 1 as reference |                                 |                                                                                                           |                      |                                            |           |          |                        |
| ORF1<br>CM1                                                                                     | 34-768;<br>244aa                | P42 [Influenza D virus<br>(D/bovine/Texas/3-13/2011)]<br>AIO11642.1; 99%; 58.44%;                         | $3 \times 10^{-85}$  | CM1 super<br>family                        | cl03846   | 1–233    | $1.17 \times 10^{-67}$ |
| NS Segment Isoform 1: 839nt                                                                     |                                 |                                                                                                           |                      |                                            |           |          |                        |
| ORF1                                                                                            | 30-710;<br>226aa                | NS11 [Influenza D virus<br>(D/bovine/Shandong/Y127/2014)<br>] AIE52112.1; 100%; 44.59%                    | $3 \times 10^{-64}$  | Flu_C_NS1<br>super family                  | cl04118   | 81–205   | $8.55 \times 10^{-12}$ |
|                                                                                                 |                                 |                                                                                                           |                      | Flu_C_NS2<br>super family                  | cl04153   | 7–63     | $3.79 \times 10^{-11}$ |
| ORF2                                                                                            | 508-837;<br>109aa               | NS2 [Influenza D virus<br>(D/bovine/<br>Oklahoma/660/2013)]<br>AGS48808.1; 96%; 33.96%                    | 0.079                |                                            |           |          |                        |
| NS Segment Isoform 2: 595nt, Splice junction 1–225:476–845 of NS segment isoform 1 as reference |                                 |                                                                                                           |                      |                                            |           |          |                        |
| ORF1                                                                                            | 36-593;<br>185aa                | NS2 [Influenza D virus<br>(D/bovine/Mexico/S7/2015)]<br>AMN87888.1; 100%; 42.16%                          | $7 \times 10^{-31}$  | Flu_C_NS2<br>super family                  | cl04153   | 7–63     | $3.79 \times 10^{-11}$ |

## References

1. Sabin, K. Z.; Jiang, P.; Gearhart, M. D.; Stewart, R.; Echeverri, K., AP-1(cFos/JunB)/miR-200a regulate the pro-regenerative glial cell response during axolotl spinal cord regeneration. *Commun Biol* **2019**, *2*, 91.
2. Lee, S. Y.; Lee, H. J.; Kim, Y. K., Comparative transcriptome profiling of selected osmotic regulatory proteins in the gill during seawater acclimation of chum salmon (*Oncorhynchus keta*) fry. *Sci Rep* **2020**, *10*, 1987.
3. Sun, Y.; Huang, Y.; Li, X.; Baldwin, C. C.; Zhou, Z.; Yan, Z.; Crandall, K. A.; Zhang, Y.; Zhao, X.; Wang, M.; et al. Fish-T1K (Transcriptomes of 1,000 Fishes) Project: large-scale transcriptome data for fish evolution studies. *Gigascience* **2016**, *5*, 18.
4. Liu, L.; Wang, S.; Zhao, L.; Jiang, J., De novo transcriptome assembly for the lung of the ornamented pygmy frog (*Microhyla fissipes*). *Genom Data* **2017**, *13*, 44-45.
5. Edwards, R. J.; Tuipulotu, D. E.; Amos, T. G.; O'Meally, D.; Richardson, M. F.; Russell, T. L.; Vallinoto, M.; Carneiro, M.; Ferrand, N.; Wilkins, M. R.; et al. Draft genome assembly of the invasive cane toad, *Rhinella marina*. *Gigascience* **2018**, *7*, giy095.
